# Supplementary material for: Ribavirin-Induced Anemia in Hepatitis C Virus Patients Undergoing Combination Therapy
Source: PubMed Central journal article supplement (PMC3033369; doi:10.1371/journal.pcbi.1001072), 2011-02-03
Supplement: pcbi.1001072.s001.pdf [file pcbi.1001072.s001.pdf]

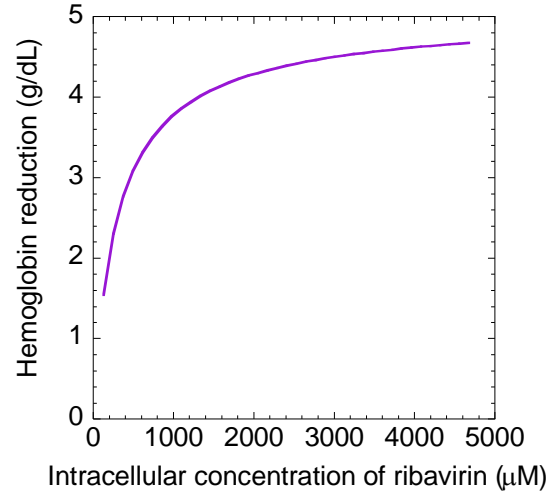

**Figure S1. Hemoglobin reduction as a function of the intracellular ribavirin concentration.**

Model prediction (line) of the reduction in  $Hb$  ( $\Delta Hb = Hb_0 - Hb_\infty$ ) as a function of  $C_{avg}$

calculated as in Fig. 5D but with Eq. (2) replaced by  $D(C) = D_0 + (D_m - D_0) \frac{C}{C + C_{50}}$  so that  $D$

reaches an asymptotic maximum of  $D_m$  for large values of  $C$ . Parameter values employed are

$k_p = 65 \text{ d}^{-1}$ ,  $k_d = 0.5 \text{ d}^{-1}$ ,  $C_{50} = 400 \mu\text{M}$ , and  $D_m = 0.05 \text{ d}^{-1}$ . All the other parameter values are

the same as in Fig. 2.
