# Supplementary material for: Ribavirin-Induced Anemia in Hepatitis C Virus Patients Undergoing Combination Therapy
Source: PubMed Central journal article supplement (PMC3033369; doi:10.1371/journal.pcbi.1001072), 2011-02-03
Supplement: pcbi.1001072.s003.pdf [file pcbi.1001072.s003.pdf]

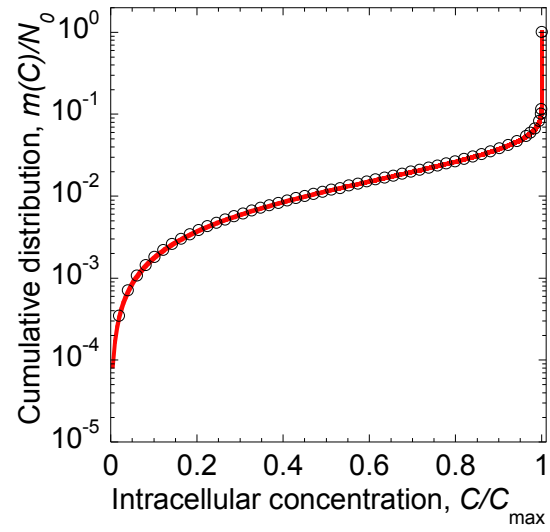

**Figure S3. Validation of the solution methodology.** Comparison of the numerical solution (symbols) obtained by integrating Eqs. (4) when  $D(C_i)=D_0$  at steady state with the corresponding analytical solution (line) provided by Eq. (S6.4). Parameter values employed are listed in Table 1.
