# Supplementary material for: Ribavirin-Induced Anemia in Hepatitis C Virus Patients Undergoing Combination Therapy
Source: PubMed Central journal article supplement (PMC3033369; doi:10.1371/journal.pcbi.1001072), 2011-02-03
Supplement: pcbi.1001072.s004.pdf [file pcbi.1001072.s004.pdf]

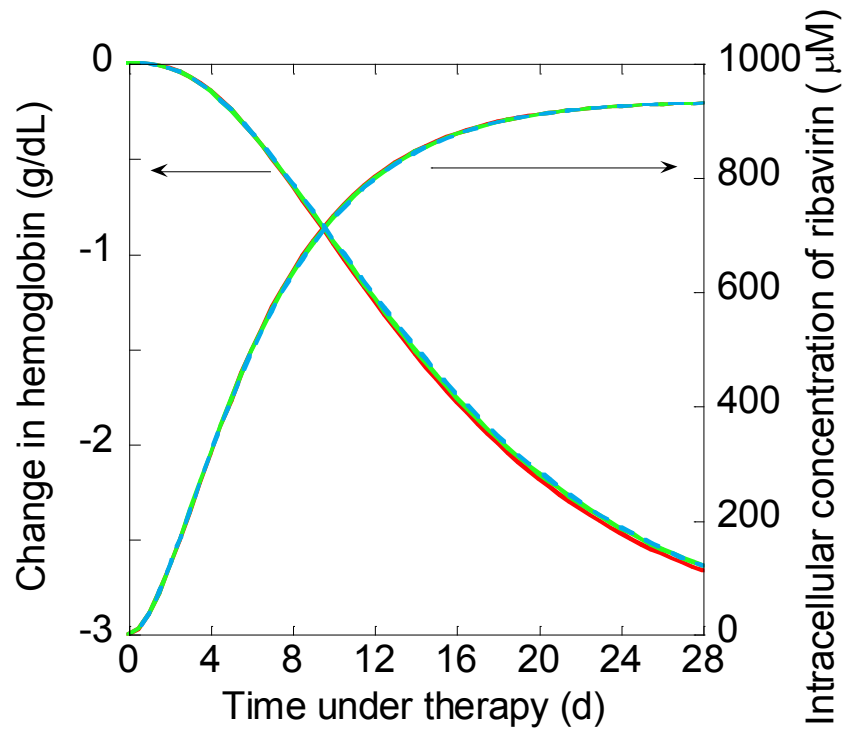

**Figure S4. Sensitivity of the numerical solution to the integration time step.** Comparison of the solution obtained by integrating Eq. (4) using three different values of the integration time step:  $\Delta t = 0.02$  d (red),  $0.01$  d (green), and  $0.005$  d (blue). Parameter values employed are listed in Methods. The decline in  $Hb$  (left y axis) is identical for  $\Delta t = 0.01$  d and  $0.005$  d and does not change for smaller values of  $\Delta t$  (not shown). The accumulation of intracellular ribavirin (right y axis) is identical for all the three values of  $\Delta t$ .
