# Supplementary material for: Ribavirin-Induced Anemia in Hepatitis C Virus Patients Undergoing Combination Therapy
Source: PubMed Central journal article supplement (PMC3033369; doi:10.1371/journal.pcbi.1001072), 2011-02-03
Supplement: pcbi.1001072.s006.pdf [file pcbi.1001072.s006.pdf]

### **Dependence of RBC death rate on intracellular ribavirin concentration**

We assume in Eq. (2) that the death rate,  $D$ , of RBCs increases with  $C$ . At large values of  $C$ , the death rate may become independent of  $C$  if other cellular processes and not the ribavirin concentration limit cell death, suggesting that  $D$  be a saturable function of  $C$  (such as a Hill-function). It follows then that beyond a certain value of  $C_{avg}^{\infty}$ , where  $D$  becomes independent of  $C$ , the total drop in  $Hb$ ,  $\Delta Hb = Hb_0 - Hb_{\infty}$ , asymptotically reaches a plateau (Fig. S1). Available data (Fig. 5), however, show a significant positive correlation between  $\Delta Hb$  and  $C_{avg}^{\infty}$  ( $R=0.36$ ,  $P<0.05$ ) suggesting an increase of  $D$  with  $C$  in the range of values of  $C$  of interest here (800-1600  $\mu\text{M}$ ; Fig. 5), which is captured by the form of  $D(C)$  in Eq. (2).
