# Supplementary material for: Ribavirin-Induced Anemia in Hepatitis C Virus Patients Undergoing Combination Therapy
Source: PubMed Central journal article supplement (PMC3033369; doi:10.1371/journal.pcbi.1001072), 2011-02-03
Supplement: pcbi.1001072.s007.pdf [file pcbi.1001072.s007.pdf]

## Analysis of phlebotomy experiments

Alexanian *et al.* measured the recovery of RBC volume following blood loss [1]. In 9 healthy volunteers, 740-1300 ml of RBC volume was removed within 3 days and all plasma returned immediately. It was ensured that no significant change in the total blood volume occurred. RBC volume recovered after ~20 days following the blood loss (Fig. S2).

The dynamics of the RBC population in these patients may be described using the following equation

$$\frac{dN}{dt} = P - D_0 N \quad (\text{S3.1})$$

where  $N$  is the population of RBCs at time  $t$  following blood loss,  $D_0$  is the death rate of RBCs, and

$$P = \frac{P_{\max} \theta^b}{\theta^b + \left(\frac{N}{V}\right)^b} \quad (\text{S3.2})$$

is the rate of RBC production, defined in Eq. (3). Our aim is to estimate the parameters in Eq. (S3.2) by analysis of the data of RBC recovery following blood loss. Before blood loss, the RBC population is constant at  $N_0$ , so that

$$\frac{P_{\max} \theta^b}{\theta^b + \left(\frac{N_0}{V}\right)^b} = D_0 N_0 \quad (\text{S3.3})$$

which provides a constraint on the parameters values. We let  $b=7$  following earlier studies [2]. We fit the evolution of the RBC volume,  $Nv_e$ , obtained by solving Eq. (S3.1) with the initial condition that just after blood loss ( $t=0$ ),  $N=N_0-N_{\text{loss}}$ , where  $N_{\text{loss}}$  is the number of RBCs removed during phlebotomy. We use  $N_{\text{loss}}$  and  $P_{\max}$  as adjustable parameters. Our model provides good fits to the data (Fig. S2) and yields  $P_{\max} = 8.3 \times 10^{11}$  cells  $\text{d}^{-1}$  (95% CI:  $5.3 \times 10^{11}$  -  $1.0 \times 10^{12}$  cells  $\text{d}^{-1}$ )

and  $N_{\text{loss}}$  corresponding to an RBC volume of 1.1 L (95% CI: 1.0-1.2 L). Eq. (S3.3) then yields  
 $\theta = 4.16 \times 10^{12}$  cells/L.

#### SUPPLEMENTAL REFERENCES

1. Alexanian R, Alfrey C (1970) Erythropoiesis in the anemia of bone marrow failure. *J Clin Invest* 49: 1986-1992.
2. Mahaffy JM, Belair J, Mackey MC (1998) Hematopoietic model with moving boundary condition and state dependent delay: applications in erythropoiesis. *J Theor Biol* 190: 135-146.
