# Supplementary material for: Ribavirin-Induced Anemia in Hepatitis C Virus Patients Undergoing Combination Therapy
Source: PubMed Central journal article supplement (PMC3033369; doi:10.1371/journal.pcbi.1001072), 2011-02-03
Supplement: pcbi.1001072.s009.pdf [file pcbi.1001072.s009.pdf]

## MATLAB program for solving model equations

Below is the program we employ for integrating model equations (Eqs. (4)).

```
%*****  
function RBVanemia  
%All quantities here are dimensionless.  
%We nondimensionalize the number of erythrocytes with 2.5e13, Hb with 15 g/dL, volume  
%with 5 L, concentration with 2 mM and time with 1 d.  
%Parameter values are mentioned in Table 1.  
global k kp dt N0 j Cpmax Cp ta kd C50 gamma Hb0 y0 D0 theta b Pmax D  
%Output time points  
time=0:1:28;  
%Assign parameter values – symbols have the same meanings as in the manuscript  
Hb0=14.4/15;  
ta=5.4;  
D0=0.00833;  
%Nondimensional N=nondimensional Hb  
N0=Hb0;  
Cpmax=7.5/2000;  
Pmax=0.0334;  
b=7;  
theta=(N0)*(Pmax/(D0*N0)-1)^(-1/b);  
kp=65;  
kd=0.5;  
C50=0.2;  
gamma=1;  
  
len=length(time);  
endtime=time(len);  
dt=0.01;  
k=(100+ceil(endtime/dt));  
  
%Initialization of variable arrays (y(1:k) store Si and y(k+1:2k) store Ci)  
y0(1:2*k)=0;  
D(1:2*k)=D0;  
y0(1)=N0;  
no_cells(1)=sum(y0(1:k));  
hb(1)=Hb0;  
deltaHb(1)=0;  
Cavg(1)=0;  
Davg(1)=D0;  
%Integration of model equations  
j=1;  
for t_out=2:1:len
```

```

final=time(t_out);
start=time(t_out-1);
while start<final
    tspan=[start start+dt];
    j=round(start/dt)+1;
    Cp=Cpmax*(1-exp(-start/ta));
    [T, Y]=eul(@diff,tspan,y0,dt);
    fi_1=length(Y(:,1));
    for ee=1:2*k
        y0(ee)=Y(fi_1,ee);
    end;
    start=start+dt;
end
%Computation of output quantities
no_cells(t_out)=sum(y0(1:k));
sumCCp=0;
sumD=0;
for i=1:k
    sumCCp=sumCCp+y0(i)*(y0(k+i)+Cp);
    sumD=sumD+y0(i)*D(i);
end;
hb(t_out)=no_cells(t_out);
deltaHb(t_out)=hb(t_out)-Hb0;
Cavg(t_out)=sumCCp/no_cells(t_out);
Davg(t_out)=sumD/no_cells(t_out);
end;

%*****
%Differential equations (Eqs. (4) in the manuscript)
function dy =diff(t,y)
global k kp theta b Pmax D0 Cp j kd C50 gamma D
dy = zeros(k*2,1);
total=sum(y(1:k));
P=Pmax*(theta.^b)/((total.^b)+(theta.^b));
%Time evolution of existing cell subpopulations.
for i=1:j
    D(i)=D0*(1+((y(i+k).^gamma)/(C50.^gamma)));
    dy(i)=-D(i)*y(i);
end;
%Time evolution of newly produced cells.
dy(j+1)=P-D(j+1)*y(j+1);
for i=k+1:j+1+k
%Time evolution of Ci
    dy(i)=kp*Cp-kd*y(i);
end
%*****

```
