# Supplementary material for: Ribavirin-Induced Anemia in Hepatitis C Virus Patients Undergoing Combination Therapy
Source: PubMed Central journal article supplement (PMC3033369; doi:10.1371/journal.pcbi.1001072), 2011-02-03
Supplement: pcbi.1001072.s010.pdf [file pcbi.1001072.s010.pdf]

## Validation of the solution methodology

We test our solution methodology by comparison of the long-time ( $t \rightarrow \infty$ ) steady state solution obtained by integrating Eq. (4) numerically and the analytical solution of Eq. (1) when  $D(C)=D_0$ .

At steady state, i.e., when  $\partial n / \partial t = 0$ , Eq. (1) becomes

$$\frac{\partial}{\partial C}(Q(C, C_c)n(C)) = n(C)D_0 \quad (\text{S6.1})$$

Substituting  $Q(C, C_c) = k_p C_c - k_d C$  and rearranging, Eq. (S6.1) yields the ordinary differential equation

$$\frac{\partial n(C)}{\partial C} = n(C) \frac{(D_0 - k_d)}{k_p C_p^{\max} - k_d C} \quad (\text{S6.2})$$

where we recognize that  $C_c = C_p^{\max}$  at steady state. We integrate Eq. (S6.2) with the boundary condition that  $n(0) = P(t \rightarrow \infty) / Q(0, C_c) = N_0 D_0 / k_p C_p^{\max}$ , where the latter equality follows from the recognition that when  $D(C)=D_0$ , ribavirin accumulation does not induce anemia so that the RBC production rate is constant throughout at  $P_0 = N_0 D_0$ . The steady state solution is thus,

$$n(C) = \frac{N_0 D_0}{k_p C_p^{\max}} \left( 1 - \frac{k_d C}{k_p C_p^{\max}} \right)^{\frac{D_0}{k_d} - 1} \quad (\text{S6.3})$$

which yields the cumulative distribution  $m(C) = \int_0^C n(C) dC$  at steady state as

$$m(C) = N_0 \left( 1 - \left( 1 - \frac{k_d C}{k_p C_p^{\max}} \right)^{\frac{D_0}{k_d}} \right) \quad (\text{S6.4})$$

$m(C)$  calculated using Eq. (S6.4) and obtained by solving Eq. (4) with  $D(C)=D_0$  are in exact agreement (Fig. S3) and present a successful test of our solution methodology.
