# Supplementary material for: Ribavirin-Induced Anemia in Hepatitis C Virus Patients Undergoing Combination Therapy
Source: PLoS Comput Biol. 2011 Feb 3;7(2):e1001072. doi: 10.1371/journal.pcbi.1001072 (PMC3033369; doi:10.1371/journal.pcbi.1001072)
Supplement: Text S1 — Derivation of equation (1) and its boundary condition. (0.29 MB PDF) [file pcbi.1001072.s005.pdf]

## Derivation of equation (1) and its boundary condition

To determine the time evolution of  $n(C, t)$ , we consider the fate of the cells  $n(C, t)\Delta C$  an infinitesimally small time interval  $\Delta t$  later. In the interval  $\Delta t$ , an expected fraction  $D(C)\Delta t$  of the cells die, where  $D(C)$  is the death rate of RBCs in which the concentration of RXP is  $C$ . In the surviving population,  $n(C, t)\Delta C(1 - D(C)\Delta t)$ , the intracellular concentration of RXP increases by the amount  $Q(C, C_c)\Delta t$ , where  $Q(C, C_c) = k_p C_c - k_d C$  is the net rate of increase of  $C$  due to phosphorylation,  $C_c$  is the intracellular concentration of (unphosphorylated) ribavirin,  $k_p$  is the phosphorylation rate and  $k_d$  is the rate of loss, including by possible slow dephosphorylation, of RXP. Consequently, cells with RXP concentration within  $Q(C, C_c)\Delta t$  of  $C + \Delta C$  at time  $t$  will have RXP concentrations larger than  $C + \Delta C$  at time  $t + \Delta t$ . Assuming that the RXP concentration is uniformly distributed in the range  $C$  to  $C + \Delta C$  at time  $t$ , it follows that the fraction  $Q(C, C_c)\Delta t / \Delta C$  of the surviving cells are lost due to the increased concentration of RXP. Consequently, the population  $n(C, t)\Delta C(1 - D(C)\Delta t)(1 - Q(C, C_c)\Delta t / \Delta C)$  survives and continues to carry RXP at concentrations between  $C$  and  $C + \Delta C$  at time  $t + \Delta t$ . Similarly, considering the fate of the cells  $n(C - \Delta C, t)\Delta C$ , it follows that the subpopulation  $n(C - \Delta C, t)\Delta C(1 - D(C - \Delta C)\Delta t)(Q(C - \Delta C, C_c)\Delta t / \Delta C)$  will survive at time  $t + \Delta t$  and have RXP at concentrations between  $C$  and  $C + \Delta C$ . Thus, the population of cells at time  $t + \Delta t$  with RXP at concentrations between  $C$  and  $C + \Delta C$  would be  $n(C, t + \Delta t)\Delta C = n(C, t)\Delta C(1 - D(C)\Delta t)\left(1 - Q(C, C_c)\frac{\Delta t}{\Delta C}\right) + n(C - \Delta C, t)\Delta C(1 - D(C - \Delta C)\Delta t)\left(Q(C - \Delta C, C_c)\frac{\Delta t}{\Delta C}\right)$ . Rearranging terms, dividing by  $\Delta t$  and  $\Delta C$ , and letting  $\Delta t \rightarrow 0$  and  $\Delta C \rightarrow 0$  yields Eq. (1):

$$\frac{\partial}{\partial t} n(C, t) = -\frac{\partial}{\partial C} [Q(C, C_c) n(C, t)] - n(C, t) D(C)$$

Equation (1) is constrained by the boundary condition that when  $t > 0$ , newborn cells contain no RXP. Thus, at any time  $t > 0$ , the cells  $n(0, t) \Delta C$ , with RXP concentration between 0 and  $\Delta C$ , would be the cells produced in the interval  $\Delta C / Q(0, C_c)$  preceding  $t$ . Thus,  $n(0, t) \Delta C = P(t) \Delta C / Q(0, C_c)$ , or  $n(0, t) = P(t) / Q(0, C_c)$ , where  $P(t)$  is the rate of production of RBCs at time  $t$  given by Eq. (3).
